## Prediction of the Coding Sequences of Unidentified Human Genes. XVI. The Complete Sequences of 150 New cDNA Clones from Brain Which Code for Large Proteins *in vitro*

Takahiro NAGASE,\* Reiko KIKUNO, Ken-ichi ISHIKAWA, Makoto HIROSAWA, and Osamu OHARA

Kazusa DNA Research Institute, 1532-3 Yana, Kisarazu, Chiba 292-0812, Japan

(Received 28 January 2000)

### Abstract

We have carried out a human cDNA sequencing project to accumulate information regarding the coding sequences of unidentified human genes. As an extension of the preceding reports, we herein present the entire sequences of 150 cDNA clones of unknown human genes, named KIAA1294 to KIAA1443, from two sets of size-fractionated human adult and fetal brain cDNA libraries. The average sizes of the inserts and corresponding open reading frames of cDNA clones analyzed here reached 4.8 kb and 2.7 kb (910 amino acid residues), respectively. From sequence similarities and protein motifs, 73 predicted gene products were functionally annotated and 97% of them were classified into the following four functional categories: cell signaling/communication, nucleic acid management, cell structure/motility and protein management. Additionally, the chromosomal loci of the genes were assigned by using human-rodent hybrid panels for those genes whose mapping data were not available in the public databases. The expression profiles of the genes were also studied in 10 human tissues, 8 brain regions, spinal cord, fetal brain and fetal liver by reverse transcription-coupled polymerase chain reaction, products of which were quantified by enzyme-linked immunosorbent assay.

**Key words:** large proteins; *in vitro* transcription/translation; cDNA sequencing; expression profile; chromosomal location; brain

We have been making efforts to accumulate information on the coding sequences of unidentified human genes.<sup>1,2</sup> Especially, recent our interest is focused on the unidentified genes encoding large proteins in human brain since these gene products are likely to play important roles in the central nervous system.<sup>2,3</sup> To identify such genes, we constructed a set of strictly size-fractionated cDNA libraries from human brain and *in vitro* transcription/translation system have been applied to select the cDNA clones coding for large proteins prior to the determination of their entire sequence.<sup>3</sup> As an alternative method for clone selection, we have recently introduced a computer-based approach using GeneMark analysis for picking up cDNA clones with a high probability of coding for protein.<sup>4</sup> This new approach would be expected to minimize the risk of overlooking important cDNA clones which fail to produce proteins *in vitro*.

The sequences of more than 1200 cDNA clones have been reported by our project and the total length of the determined sequences exceeds 6.3 Mb<sup>1-3</sup> and the average

length of gene products deduced from the cDNAs from brain is over 900 amino acid residues.<sup>2,3</sup> As an extension of the preceding reports, we herein report the coding sequence features of 150 new cDNA clones which have the potential to code for large proteins *in vitro*. In addition to the specific features of the newly predicted protein sequences annotated by the database search, the expression profiles and the chromosomal locations of these 150 new genes are also described. The information regarding these newly identified genes would greatly increase our understanding of the biological functions of human genes at the molecular level.

### 1. Sequence Analysis and Prediction of Protein-Coding Regions in cDNA Clones

cDNA clones to be entirely sequenced were selected according to the following criteria: (1) novelties of their single-pass sequences of both the cDNA ends; (2) potentialities of their protein coding. The latter criterion was critical for us to conduct our cDNA project efficiently, because there are many cDNA clones which apparently do not possess a protein-coding region in the

Communicated by Michio Oishi

\* To whom correspondence should be addressed. Tel. +81-438-52-3930, Fax. +81-438-52-3931, E-mail: nagase@kazusa.or.jp

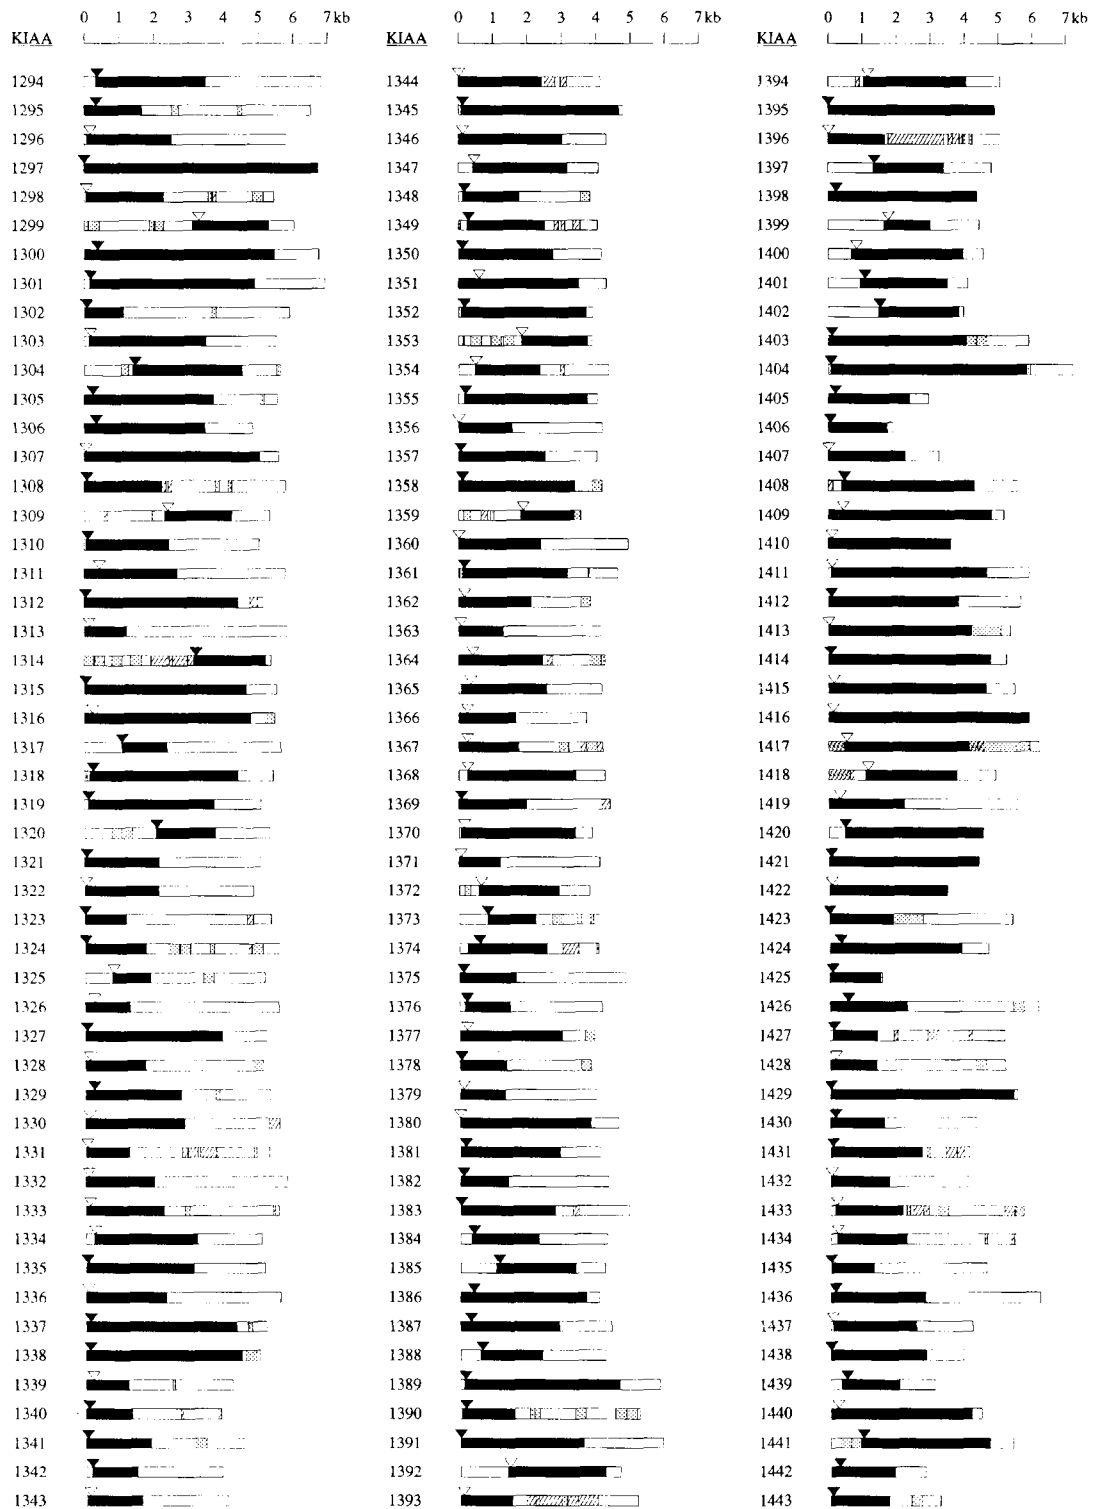

**Figure 1.** Physical maps of cDNA clones analyzed. The physical maps shown here were constructed from the sequence data of respective cDNA clones or, when necessary, from the combination of cDNA clones and RT-PCR products. The horizontal scale represents the cDNA length in kb, and the gene numbers corresponding to respective cDNAs are given on the left. The ORFs and untranslated regions are shown by solid and open boxes, respectively. The positions of the first ATG codons, with or without the contexts of the Kozak's rule, are indicated by solid and open triangles, respectively. RepeatMasker, a program that screens DNA sequences for interspersed repeats known to exist in mammalian genomes, was applied to detect repeat sequences in respective cDNA sequences (Smit, A.F.A. and Green, P., RepeatMasker at <http://ftp.genome.washington.edu/RM/RepeatMasker.html>). Short interspersed nucleotide elements (SINEs) including Alu and MIRs sequences and other repetitive sequences thus detected are represented by dotted and hatched boxes, respectively.

Table 1. Information of sequence data and chromosomal locations of the identified genes.

| Gene number (KIAA) | Accession number <sup>a)</sup> | cDNA length (bp) <sup>b)</sup> | ORF length (amino acid residues) <sup>c)</sup> | Chromosomal location <sup>d)</sup> | Gene number (KIAA) | Accession number <sup>a)</sup> | cDNA length (bp) <sup>b)</sup> | ORF length (amino acid residues) <sup>c)</sup> | Chromosomal location <sup>d)</sup> |
|--------------------|--------------------------------|--------------------------------|------------------------------------------------|------------------------------------|--------------------|--------------------------------|--------------------------------|------------------------------------------------|------------------------------------|
| 1294               | AB037715                       | 6,816                          | 1,051                                          | 10                                 | 1369               | AB037790                       | 4,391                          | 653                                            | 7                                  |
| 1295               | AB037716                       | 6,524                          | 550                                            | 5                                  | 1370               | AB037791                       | 3,863                          | 1,107                                          | 15                                 |
| 1296               | AB037717                       | 5,796                          | 815                                            | 10                                 | 1371               | AB037792                       | 4,096                          | 395                                            | 4                                  |
| 1297               | AB037718                       | 6,726                          | 2,242                                          | 2                                  | 1372               | AB037793                       | 3,771                          | 773                                            | 11                                 |
| 1298               | AB037719                       | 5,463                          | 738                                            | 12                                 | 1373               | AB037794                       | 4,052                          | 463                                            | 10                                 |
| 1299               | AB037720                       | 6,043                          | 730                                            | 16                                 | 1374               | AB037795                       | 4,044                          | 764                                            | 3                                  |
| 1300               | AB037721                       | 6,747                          | 1,820                                          | 15                                 | 1375               | AB037796                       | 4,823                          | 546                                            | 3                                  |
| 1301               | AB037722                       | 6,926                          | 1,581                                          | 2                                  | 1376               | AB037797                       | 4,131                          | 437                                            | 5                                  |
| 1302               | AB037723                       | 5,904                          | 375                                            | 11                                 | 1377               | AB037798                       | 3,916                          | 988                                            | 11                                 |
| 1303               | AB037724                       | 5,538                          | 1,119                                          | 17                                 | 1378               | AB037799                       | 3,815                          | 451                                            | 4                                  |
| 1304               | AB037725                       | 5,633                          | 1,051                                          | 12                                 | 1379               | AB037800                       | 3,956                          | 434                                            | 6                                  |
| 1305               | AB037726                       | 5,553                          | 1,238                                          | 14                                 | 1380               | AB037801                       | 4,614                          | 1,265                                          | 10                                 |
| 1306               | AB037727                       | 4,832                          | 1,154                                          | 16                                 | 1381               | AB037802                       | 4,052                          | 961                                            | 17                                 |
| 1307               | AB037728                       | 5,601                          | 1,678                                          | 1                                  | 1382               | AB037803                       | 4,312                          | 462                                            | 12                                 |
| 1308               | AB037729                       | 5,796                          | 745                                            | 9                                  | 1383               | AB037804                       | 4,904                          | 907                                            | 1                                  |
| 1309               | AB037730                       | 5,331                          | 639                                            | 9                                  | 1384               | AB037805                       | 4,261                          | 652                                            | 18                                 |
| 1310               | AB037731                       | 5,028                          | 794                                            | 2                                  | 1385               | AB037806                       | 4,193                          | 768                                            | 14                                 |
| 1311               | AB037732                       | 5,774                          | 809                                            | 5                                  | 1386               | AB037807                       | 4,030                          | 1,214                                          | 7                                  |
| 1312               | AB037733                       | 5,139                          | 1,471                                          | 3                                  | 1387               | AB037808                       | 4,385                          | 950                                            | 2                                  |
| 1313               | AB037734                       | 5,818                          | 398                                            | X                                  | 1388               | AB037809                       | 4,220                          | 599                                            | 16                                 |
| 1314               | AB037735                       | 5,369                          | 681                                            | 18                                 | 1389               | AB037810                       | 5,801                          | 1,514                                          | 1                                  |
| 1315               | AB037736                       | 5,526                          | 1,545                                          | 6                                  | 1390               | AB037811                       | 5,222                          | 505                                            | 1                                  |
| 1316               | AB037737                       | 5,477                          | 1,590                                          | 14                                 | 1391               | AB037812                       | 5,901                          | 1,194                                          | 11                                 |
| 1317               | AB037738                       | 5,646                          | 435                                            | 5                                  | 1392               | AB037813                       | 4,654                          | 950                                            | 4                                  |
| 1318               | AB037739                       | 5,425                          | 1,418                                          | X                                  | 1393               | AB037814                       | 5,164                          | 500                                            | 14                                 |
| 1319               | AB037740                       | 5,073                          | 1,208                                          | 1                                  | 1394               | AB037815                       | 5,065                          | 1,003                                          | 11                                 |
| 1320               | AB037741                       | 5,321                          | 567                                            | 6                                  | 1395               | AB037816                       | 4,886                          | 1,628                                          | 19                                 |
| 1321               | AB037742                       | 5,058                          | 714                                            | 17                                 | 1396               | AB037817                       | 5,041                          | 551                                            | 19                                 |
| 1322               | AB037743                       | 4,832                          | 702                                            | 4                                  | 1397               | AB037818                       | 4,810                          | 686                                            | 6                                  |
| 1323               | AB037744                       | 5,356                          | 396                                            | 18                                 | 1398               | AB037819                       | 4,372                          | 1,456                                          | 7                                  |
| 1324               | AB037745                       | 5,567                          | 580                                            | 1                                  | 1399               | AB037820                       | 4,450                          | 452                                            | 2                                  |
| 1325               | AB037746                       | 5,155                          | 354                                            | 4                                  | 1400               | AB037821                       | 4,554                          | 1,093                                          | 4                                  |
| 1326               | AB037747                       | 5,563                          | 424                                            | 14                                 | 1401               | AB037822                       | 4,107                          | 853                                            | 17                                 |
| 1327               | AB037748                       | 5,205                          | 1,310                                          | 4                                  | 1402               | AB037823                       | 3,970                          | 788                                            | 17                                 |
| 1328               | AB037749                       | 5,097                          | 574                                            | 18                                 | 1403               | AB037824                       | 5,897                          | 1,337                                          | 15                                 |
| 1329               | AB037750                       | 5,287                          | 907                                            | 4                                  | 1404               | AB037825                       | 7,204                          | 1,925                                          | 20                                 |
| 1330               | AB037751                       | 5,577                          | 945                                            | 15                                 | 1405               | AB037826                       | 2,945                          | 791                                            | 1                                  |
| 1331               | AB037752                       | 5,273                          | 412                                            | 3                                  | 1406               | AB037827                       | 1,876                          | 571                                            | 9                                  |
| 1332               | AB037753                       | 5,788                          | 651                                            | 1                                  | 1407               | AB037828                       | 3,247                          | 744                                            | 3                                  |
| 1333               | AB037754                       | 5,534                          | 741                                            | 14                                 | 1408               | AB037829                       | 5,568                          | 1,298                                          | 10                                 |
| 1334               | AB037755                       | 5,043                          | 989                                            | 5                                  | 1409               | AB037830                       | 5,160                          | 1,597                                          | 14                                 |
| 1335               | AB037756                       | 5,123                          | 1,026                                          | 20                                 | 1410               | AB037831                       | 3,604                          | 1,201                                          | 3                                  |
| 1336               | AB037757                       | 5,591                          | 766                                            | 2                                  | 1411               | AB037832                       | 5,900                          | 1,522                                          | 6                                  |
| 1337               | AB037758                       | 5,181                          | 1,438                                          | 1                                  | 1412               | AB037833                       | 5,664                          | 1,274                                          | 9                                  |
| 1338               | AB037759                       | 4,994                          | 1,495                                          | 15                                 | 1413               | AB037834                       | 5,361                          | 1,399                                          | 4                                  |
| 1339               | AB037760                       | 4,217                          | 409                                            | 7                                  | 1414               | AB037835                       | 5,242                          | 1,586                                          | 2                                  |
| 1340               | AB037761                       | 3,876                          | 441                                            | 12                                 | 1415               | AB037836                       | 5,480                          | 1,539                                          | 20                                 |
| 1341               | AB037762                       | 4,544                          | 620                                            | 15                                 | 1416               | AB037837                       | 5,901                          | 1,967                                          | 8                                  |
| 1342               | AB037763                       | 3,910                          | 426                                            | 18                                 | 1417               | AB037838                       | 6,206                          | 1,217                                          | 6                                  |
| 1343               | AB037764                       | 4,083                          | 520                                            | 1                                  | 1418               | AB037839                       | 4,896                          | 889                                            | 2                                  |
| 1344               | AB037765                       | 4,135                          | 806                                            | 14                                 | 1419               | AB037840                       | 5,560                          | 738                                            | 11                                 |
| 1345               | AB037766                       | 4,790                          | 1,532                                          | 4                                  | 1420               | AB037841                       | 4,516                          | 1,349                                          | 1                                  |
| 1346               | AB037767                       | 4,309                          | 999                                            | 21                                 | 1421               | AB037842                       | 4,391                          | 1,463                                          | 15                                 |
| 1347               | AB037768                       | 4,075                          | 918                                            | 3                                  | 1422               | AB037843                       | 3,456                          | 1,151                                          | 9                                  |
| 1348               | AB037769                       | 3,830                          | 545                                            | 16                                 | 1423 <sup>e)</sup> | AB037844                       | 5,390                          | 616                                            | 6                                  |
| 1349               | AB037770                       | 4,055                          | 752                                            | 17                                 | 1424 <sup>f)</sup> | AB037845                       | 4,655                          | 1,286                                          | 6                                  |
| 1350               | AB037771                       | 4,153                          | 911                                            | 4                                  | 1425 <sup>g)</sup> | AB037846                       | 1,543                          | 495                                            | 1                                  |
| 1351               | AB037772                       | 4,307                          | 1,163                                          | 10                                 | 1426 <sup>h)</sup> | AB037847                       | 6,140                          | 758                                            | 16                                 |
| 1352               | AB037773                       | 3,893                          | 1,212                                          | 5                                  | 1427 <sup>i)</sup> | AB037848                       | 5,145                          | 439                                            | 11                                 |
| 1353               | AB037774                       | 3,877                          | 640                                            | 1                                  | 1428 <sup>j)</sup> | AB037849                       | 5,148                          | 458                                            | 3                                  |
| 1354               | AB037775                       | 4,352                          | 632                                            | 9                                  | 1429 <sup>k)</sup> | AB037850                       | 5,507                          | 1,795                                          | 5                                  |
| 1355               | AB037776                       | 4,036                          | 1,189                                          | 1                                  | 1430 <sup>l)</sup> | AB037851                       | 4,282                          | 527                                            | 4                                  |
| 1356               | AB037777                       | 4,183                          | 519                                            | 2                                  | 1431 <sup>m)</sup> | AB037852                       | 4,076                          | 891                                            | 19                                 |
| 1357               | AB037778                       | 4,022                          | 836                                            | 6                                  | 1432 <sup>n)</sup> | AB037853                       | 4,024                          | 571                                            | 9                                  |
| 1358               | AB037779                       | 4,183                          | 1,123                                          | 7                                  | 1433 <sup>o)</sup> | AB037854                       | 5,671                          | 652                                            | 2                                  |
| 1359               | AB037780                       | 3,550                          | 517                                            | 3                                  | 1434 <sup>p)</sup> | AB037855                       | 5,443                          | 677                                            | 20                                 |
| 1360               | AB037781                       | 4,944                          | 796                                            | 12                                 | 1435 <sup>q)</sup> | AB037856                       | 4,574                          | 415                                            | 2                                  |
| 1361               | AB037782                       | 4,620                          | 1,005                                          | 17                                 | 1436 <sup>r)</sup> | AB037857                       | 6,160                          | 924                                            | 1                                  |
| 1362               | AB037783                       | 3,842                          | 699                                            | 12                                 | 1437 <sup>s)</sup> | AB037858                       | 4,161                          | 811                                            | 9                                  |
| 1363               | AB037784                       | 4,116                          | 430                                            | 3                                  | 1438 <sup>t)</sup> | AB037859                       | 3,907                          | 934                                            | 22                                 |
| 1364               | AB037785                       | 4,261                          | 811                                            | 22                                 | 1439 <sup>u)</sup> | AB037860                       | 3,063                          | 561                                            | 1                                  |
| 1365               | AB037786                       | 4,150                          | 831                                            | 1                                  | 1440 <sup>v)</sup> | AB037861                       | 4,434                          | 1,377                                          | 7                                  |
| 1366               | AB037787                       | 3,716                          | 550                                            | 17                                 | 1441 <sup>w)</sup> | AB037862                       | 5,378                          | 1,258                                          | 1                                  |
| 1367               | AB037788                       | 4,196                          | 579                                            | 14                                 | 1442 <sup>x)</sup> | AB037863                       | 2,782                          | 627                                            | 20                                 |
| 1368               | AB037789                       | 4,250                          | 1,049                                          | 5                                  | 1443 <sup>y)</sup> | AB037864                       | 3,239                          | 573                                            | 14                                 |

a) Accession numbers of DDBJ, EMBL and GenBank databases. b) Values excluding poly(A) sequences. c) Values were calculated from the number of amino acid residues between two termination codons in the case where the in-frame termination codon exists upstream of the first ATG codon. d) Chromosome numbers were identified by using GeneBridge 4 radiation hybrid panel unless specified. The actual primer sequences and the PCR conditions used for the radiation hybrid mapping are accessible through the World Wide Web at <http://www.kazusa.or.jp/huge>. The chromosomal locations highlighted by asterisks were fetched from the UniGene database. The chromosomal locations highlighted by sharp were referred from the GenBank database because the sequences of the cDNA clones could be found in the genomic sequences whose chromosome numbers were assigned. e) cDNA and ORF lengths were revised by direct analysis of the RT-PCR products. f) Nucleotide sequences were determined after subcloning of the internal *Not* I-digested fragment. Therefore, cDNA length of these genes represented those of *internal Not* I-digested fragment. g) cDNA clones were selected by analysis of 5'-end single-pass sequences using the GeneMark analysis.

**Table 2.** Functional classifications of the gene products.2-1. Predicted function based on homology search<sup>a)</sup>

| Function <sup>b)</sup>       | Gene product            | aa.res.  | OWL ID   | aa.res.  | % identity | % coverage <sup>c)</sup> | Definition                                                                |                                                                          |
|------------------------------|-------------------------|----------|----------|----------|------------|--------------------------|---------------------------------------------------------------------------|--------------------------------------------------------------------------|
| Cell signaling/communication | KIAA1296                | 815      | AF078667 | 714      | 82         | 96                       | ponsin-1, complete cds. - mouse                                           |                                                                          |
|                              | KIAA1297                | 2242     | P53355   | 1431     | 35         | 13                       | death-associated protein kinase 1 - human                                 |                                                                          |
|                              | KIAA1299                | 730      | JC5887   | 670      | 93         | 92                       | signaling mediator variant - mouse                                        |                                                                          |
|                              | KIAA1304                | 1051     | P98171   | 946      | 48         | 72                       | rho-GAP hematopoietic protein C1 - human                                  |                                                                          |
|                              | KIAA1308                | 745      | Q05385   | 852      | 81         | 73                       | guanine nucleotidedissociation stimulator raGDS form A - mouse            |                                                                          |
|                              | KIAA1312                | 1471     | D67076   | 951      | 44         | 46                       | secretory protein containing thrombospondin motifs, complete cds. - mouse |                                                                          |
|                              | KIAA1314                | 681      | Y00661   | 1227     | 30         | 30                       | bcr - human                                                               |                                                                          |
|                              | KIAA1322                | 702      | U81500   | 438      | 39         | 50                       | phgA gene, complete cds. - <i>Dicystostelium discoideum</i>               |                                                                          |
|                              | KIAA1327                | 1310     | T03730   | 1567     | 61         | 100                      | antigen containing epitope to monoclonal antibody MMS-85-12 - mouse       |                                                                          |
|                              | KIAA1338                | 1495     | M20487   | 1020     | 35         | 31                       | protein kinase GCN2, complete cds. - <i>S.cerevisiae</i>                  |                                                                          |
|                              | KIAA1342                | 426      | P50232   | 425      | 90         | 100                      | synaptotagmin IV - rat                                                    |                                                                          |
|                              | KIAA1347                | 918      | A42764   | 919      | 97         | 100                      | Ca2+-transporting ATPase (EC 3.6.1.38) - rat                              |                                                                          |
|                              | KIAA1348                | 545      | AF062741 | 530      | 84         | 97                       | pyruvate dehydrogenase phosphatase isoenzyme 2, complete cds. - rat       |                                                                          |
|                              | KIAA1356                | 519      | P08104   | 1951     | 97         | 100                      | sodium channel protein, brain I alpha subunit - human                     |                                                                          |
|                              | KIAA1361                | 1005     | AF084205 | 1001     | 99         | 100                      | serine/threonine protein kinase TAO1, complete cds. - rat                 |                                                                          |
|                              | KIAA1366                | 550      | U41662   | 836      | 98         | 100                      | neurologin 2, complete cds. - rat                                         |                                                                          |
|                              | KIAA1368                | 1049     | AF030430 | 888      | 93         | 84                       | semaphorin VIa, complete cds. - mouse                                     |                                                                          |
|                              | KIAA1369                | 653      | AF028808 | 619      | 83         | 95                       | hemin-sensitive initiation factor 2 alpha kinase, complete cds. - mouse   |                                                                          |
|                              | KIAA1385                | 768      | Q05555   | 736      | 100        | 96                       | gephyrin (putative glycine receptor-tubulin linker protein) - rat         |                                                                          |
|                              | KIAA1389                | 1514     | AF090989 | 1783     | 53         | 96                       | putative GAP protein alpha, complete cds. - human                         |                                                                          |
|                              | KIAA1400                | 1093     | U88549   | 896      | 97         | 80                       | OL-protocadherin, complete cds. - mouse                                   |                                                                          |
|                              | KIAA1422                | 1151     | AF089730 | 1237     | 94         | 91                       | potassium channel subunit (Slack), complete cds. - rat                    |                                                                          |
|                              | KIAA1424                | 1286     | U02289   | 1439     | 48         | 17                       | GTPase-activating protein (CEGAP), partial cds. - <i>C. elegans</i>       |                                                                          |
|                              | KIAA1427                | 439      | P46096   | 421      | 32         | 61                       | synaptotagmin I - mouse                                                   |                                                                          |
|                              | KIAA1436                | 924      | Q62786T  | 879      | 89         | 95                       | prostaglandin F2-alpha receptor regulatory protein precursor - rat        |                                                                          |
|                              | Nucleic acid management | KIAA1339 | 409      | AF020591 | 715        | 45                       | 61                                                                        | zinc finger protein, complete cds. - human                               |
|                              |                         | KIAA1341 | 620      | A56704   | 435        | 90                       | 73                                                                        | regulatory protein Myef-2 - mouse                                        |
|                              |                         | KIAA1349 | 752      | Q05481   | 1191       | 56                       | 88                                                                        | zinc finger protein 43 - human                                           |
|                              |                         | KIAA1367 | 579      | Q10568   | 782        | 99                       | 100                                                                       | cleavage and polyadenylation specificity factor, 100 kD subunit - bovine |
|                              |                         | KIAA1380 | 1265     | Q63679   | 1214       | 46                       | 66                                                                        | testis specific protein A - rat                                          |
|                              |                         | KIAA1388 | 599      | Q05481   | 1191       | 39                       | 83                                                                        | zinc finger protein 91 - human                                           |
|                              |                         | KIAA1396 | 551      | P52742   | 469        | 59                       | 83                                                                        | zinc finger protein 135 - human                                          |
|                              |                         | KIAA1416 | 1967     | X86691   | 1912       | 42                       | 34                                                                        | 218kD Mi-2 - human                                                       |
| KIAA1431                     |                         | 891      | P10078   | 614      | 75         | 64                       | zinc finger protein ZFP28 - mouse                                         |                                                                          |
| KIAA1439                     |                         | 561      | P09414   | 509      | 100        | 91                       | nuclear factor 1 (NF-1) - rat                                             |                                                                          |
| KIAA1442                     |                         | 627      | U92704   | 551      | 77         | 83                       | Olf-1/EBF-like-2(OS) transcription factor, complete cds. - mouse          |                                                                          |
| KIAA1443                     |                         | 573      | JC4863   | 873      | 35         | 35                       | homeotic protein protein zhx-1 - mouse                                    |                                                                          |
| Protein management           |                         | KIAA1301 | 1581     | P46934   | 927        | 36                       | 49                                                                        | KIAA0322, partial cds. - human                                           |
|                              | KIAA1320                | 567      | AF037454 | 854      | 45         | 61                       | ubiquitin protein ligase, complete cds. - mouse                           |                                                                          |
|                              | KIAA1346                | 999      | T00017   | 951      | 82         | 95                       | ADAMTS-1 protein - mouse                                                  |                                                                          |
|                              | KIAA1352                | 1212     | Q09996   | 1198     | 56         | 97                       | probable leucyl-tRNA synthetase (EC 6.1.1.4) - <i>C. elegans</i>          |                                                                          |
| Metabolism                   | KIAA1363                | 430      | A58922   | 398      | 43         | 94                       | esterase-N-deacetylase (EC 3.5.1.-), 50k hepatic - rabbit                 |                                                                          |
| Cell structure/motility      | KIAA1294                | 1051     | P26044   | 583      | 32         | 24                       | radixin - pig                                                             |                                                                          |
|                              | KIAA1306                | 1154     | S22697   | 464      | 33         | 18                       | extensin - <i>Volvox carteri</i>                                          |                                                                          |
|                              | KIAA1309                | 639      | AF059569 | 593      | 30         | 85                       | actin binding protein MAYVEN, complete cds. - human                       |                                                                          |
|                              | KIAA1354                | 632      | AF059569 | 593      | 30         | 86                       | actin binding protein MAYVEN, complete cds. - human                       |                                                                          |
|                              | KIAA1357                | 836      | S22697   | 464      | 35         | 25                       | extensin - <i>Volvox carteri</i>                                          |                                                                          |
|                              | KIAA1362                | 699      | AF038388 | 766      | 33         | 64                       | actin-filament binding protein Frabin, complete cds. - rat                |                                                                          |
|                              | KIAA1365                | 831      | U66707   | 1495     | 93         | 100                      | densin-180, complete cds. - rat                                           |                                                                          |
|                              | KIAA1378                | 451      | AF059569 | 593      | 36         | 95                       | actin binding protein MAYVEN, complete cds. - human                       |                                                                          |
|                              | KIAA1405                | 791      | AF009624 | 242      | 91         | 30                       | KIF3-related motor protein, partial cds. - human                          |                                                                          |
|                              | KIAA1410                | 1201     | U03975   | 1125     | 77         | 68                       | dynein heavy chain isotype 6, partial cds. - sea urchin                   |                                                                          |
|                              | KIAA1437                | 811      | U66707   | 1495     | 30         | 38                       | densin-180, complete cds. - rat                                           |                                                                          |

a) Homology search was performed by Smith-Waterman algorithm, using BioView Toolkit and GeneMatcher (revision 3.3, Paracel Inc. USA) against OWL database (release 31.4). The homologous protein with the highest score was listed, when it satisfied the following conditions, i) the protein was functionally annotated, ii) the aligned region exceeded 200 amino acid residues, and iii) percent identity in the aligned region was 30% or greater. b) Function was classified based on the annotation of the entry of the homologous protein in the database. c) The values mean the ratio of the length of aligned region to the original length of the query sequence, in percentage.

cDNA libraries derived from tissue poly(A)<sup>+</sup> RNA. To screen cDNA clones according to their protein-coding capability, we have used an *in vitro* expression system and recently introduced a computer-based method called GeneMark analysis for minimizing the risk of overlooking important cDNA clones.<sup>2,4</sup> In this report, 21 cDNA clones were selected by GeneMark analysis and 129 cDNA clones were selected by the *in vitro* expression system. These cDNA clones were isolated from the size-fractionated human adult brain cDNA libraries Nos. 2 to 5 (insert sizes ranging from 4 to 6 kb) and the size-fractionated human fetal brain cDNA libraries Nos. 4 and 6 (insert sizes ranging from 4 to 7 kb) previously constructed.<sup>2,3</sup> The clones with unidentified sequences at both ends were chosen by single-

pass sequencing and a homology search was performed against the GenBank database (release 113.0) excluding expressed sequence tags and genomic sequences.<sup>3</sup> A total of 35 cDNA clones (KIAA1389-KIAA1402, KIAA1415-KIAA1422, KIAA1424, KIAA1425 and KIAA1433-KIAA1443) were selected from the adult brain libraries and the remaining 115 cDNA clones were obtained from the fetal brain cDNA libraries. Entire sequencing of these clones was performed according to the methods previously described in detail.<sup>2,3</sup> Twenty-three clones (KIAA1403-KIAA1425) seemed to carry spurious coding interruption caused by errors of the reverse transcriptase or by retained intron sequences. For these cases, the sequences of the regions causing interruption of an open reading frame (ORF) were reexamined by direct se-

Table 2. Continued.

2-2. Predicted function by motif search<sup>a)</sup>

| Function <sup>b)</sup>       | Gene product | aa res. | Pfam ID  | E-value <sup>c)</sup>                               | Definition                                      |
|------------------------------|--------------|---------|----------|-----------------------------------------------------|-------------------------------------------------|
| Cell signaling/communication | KIAA1295     | 550     | PF00018  | 4.80E-06                                            | SH3 domain                                      |
|                              |              |         | PF00018  | 1.30E-04                                            | SH3 domain                                      |
|                              | KIAA1298     | 738     | PF00782  | 2.10E-34                                            | Dual specificity phosphatase, catalytic domain  |
|                              | KIAA1330     | 945     | PF00047  | 4.10E-02                                            | Immunoglobulin domain                           |
|                              | KIAA1355     | 1189    | PI00041  | 1.50E-09                                            | Fibronectin type III domain                     |
|                              |              |         | PF00041  | 1.80E-08                                            | Fibronectin type III domain                     |
|                              |              |         | PF00047  | 5.70E-01                                            | Immunoglobulin domain                           |
|                              |              |         | PF00047  | 4.20E-12                                            | Immunoglobulin domain                           |
|                              |              |         | PF00047  | 3.60E-08                                            | Immunoglobulin domain                           |
|                              |              |         | PF00047  | 5.50E-05                                            | Immunoglobulin domain                           |
|                              |              |         | PF00047  | 9.00E-06                                            | Immunoglobulin domain                           |
|                              | KIAA1360     | 796     | PF00069  | 3.00E-07                                            | Eukaryotic protein kinase domain                |
|                              | KIAA1391     | 1194    | PF00169  | 9.30E-01                                            | PH domain                                       |
|                              |              |         | PF00620  | 7.30E-30                                            | RhoGAP domain                                   |
|                              | KIAA1406     | 1876    | PF00888  | 4.00E-01                                            | Cullin family                                   |
| KIAA1415                     | 1539         | PF00610 | 1.70E-10 | Domain found in Dishevelled, Egl-10, and Pleckstrin |                                                 |
| KIAA1428                     | 458          | PF00169 | 5.10E-04 | PH domain                                           |                                                 |
|                              |              | PF00640 | 8.70E-04 | Phosphotyrosine interaction domain                  |                                                 |
| Nucleic acid management      | KIAA1311     | 889     | PF00076  | 5.90E-02                                            | RNA recognition motif                           |
|                              |              |         | PF00642  | 3.50E-02                                            | Zinc finger C-x8-C-x5-C-x3-H type               |
|                              | KIAA1343     | 520     | PF00249  | 1.80E-08                                            | Myb-like DNA-binding domain                     |
|                              |              |         | PF00249  | 4.10E-06                                            | Myb-like DNA-binding domain                     |
|                              |              |         | PF01448  | 3.30E-12                                            | ELM2 domain                                     |
|                              | KIAA1384     | 652     | PF00651  | 2.60E-24                                            | BTB/POZ domain                                  |
|                              |              |         | PF01344  | 4.10E-02                                            | Kelch motif                                     |
|                              |              |         | PF01344  | 7.60E-03                                            | Kelch motif                                     |
|                              |              |         | PF01344  | 5.10E-15                                            | Kelch motif                                     |
|                              |              |         | PF01344  | 5.20E-06                                            | Kelch motif                                     |
|                              |              |         | PF01344  | 5.90E-05                                            | Kelch motif                                     |
|                              |              |         | PF01344  | 1.20E-01                                            | Kelch motif                                     |
|                              | KIAA1425     | 495     | PF00249  | 9.20E-01                                            | Myb-like DNA-binding domain                     |
|                              | KIAA1441     | 1258    | PF00096  | 3.10E-02                                            | Zinc finger, C2H2 type                          |
|                              |              |         | PF00096  | 6.50E-02                                            | Zinc finger, C2H2 type                          |
|                              |              |         | PF00096  | 9.80E-04                                            | Zinc finger, C2H2 type                          |
|                              |              |         | PF00096  | 2.30E-02                                            | Zinc finger, C2H2 type                          |
| PF00096                      |              |         | 5.20E-03 | Zinc finger, C2H2 type                              |                                                 |
| Cell structure/motility      | KIAA1364     | 811     | PF00307  | 8.60E-18                                            | Calponin homology (CH) domain                   |
|                              |              |         | PF00412  | 3.30E-06                                            | LIM domain containing proteins                  |
| Protein management           | KIAA1333     | 741     | PF00632  | 2.20E-01                                            | HECT-domain                                     |
|                              |              |         | PF00443  | 6.30E-01                                            | Ubiquitin carboxyl-terminal hydrolase family 2  |
|                              | KIAA1350     | 911     | PF00442  | 4.10E-13                                            | Ubiquitin carboxyl-terminal hydrolases family 2 |
|                              |              |         | PF00443  | 9.10E-20                                            | Ubiquitin carboxyl-terminal hydrolase family 2  |
|                              | KIAA1414     | 1586    | PF00298  | 1.40E-01                                            | Ribosomal protein L11                           |
| Metabolism                   | KIAA1315     | 1545    | PF00389  | 3.50E-01                                            | D-isomer specific 2-hydroxyacid dehydrogenases  |

a) Motif search was performed by HMMER2.1.1 against Pfam database (release 4.4). b) Function was classified based on the annotation of the Pfam entry which was hit in the query sequence. c) Only the entries possessing the expectation value (E-value) less than 1.0 were presented.

quencing of the major reverse transcription-coupled polymerase chain reaction (RT-PCR) products to precisely predict protein-coding sequences.<sup>5</sup> This examination revealed spurious interruptions in the following clones: ORFs in 7 clones (KIAA1403, KIAA1405, KIAA1409, KIAA1410, KIAA1415, KIAA1424 and KIAA1425) were found to carry single- or multiple-insertions most of which probably corresponded to intronic sequences; ORFs in 7 clones (KIAA1411, KIAA1412, KIAA1413, KIAA1416, KIAA1418, KIAA1420 and KIAA1421) were frame-shifted by single- or double-short insertions or single-deletion (< 5 nucleotide residues); ORFs in 4 clones (KIAA1404, KIAA1408, KIAA1417 and KIAA1423) were found to carry single- or double-deletions; ORFs in 4 clones (KIAA1406, KIAA1407, KIAA1414 and KIAA1422) were divided into some por-

tions by a combination of spurious interruptions including insertions/deletions; KIAA1419 carried a nonsense mutation in the ORF. For those genes, the revised sequences by the RT-PCR experiments, not the actual cloned cDNA sequences, were deposited to GenBank/EMBL/DDBJ databases and used for analyses in this study including prediction of their protein-coding sequences unless otherwise stated. The results of the comparison between the cloned DNA and the revised DNA sequences are available through the World Wide Web site at <http://www.kazusa.or.jp/huge>. The actual primer sequences and the PCR conditions used for the RT-PCR experiment are accessible through the web site at <http://www.kazusa.or.jp/~hirosawa/interruption/entrance.html>. Notably, clones for eight genes (KIAA1297, KIAA1395, KIAA1398, KIAA1410,

Table 3. Homologues of the newly identified genes found in various databases.<sup>a)</sup>

| Database <sup>b)</sup> | New gene | aa. res. <sup>c)</sup> | ID in database | aa. res.      | % identity | % coverage <sup>d)</sup>                                           | Comment <sup>e)</sup>                                                                                |                                                           |
|------------------------|----------|------------------------|----------------|---------------|------------|--------------------------------------------------------------------|------------------------------------------------------------------------------------------------------|-----------------------------------------------------------|
| HUGE and new genes     | KIAA1294 | 1051                   | KIAA1013       | 1062          | 51         | 90                                                                 |                                                                                                      |                                                           |
|                        | KIAA1301 | 1581                   | KIAA0322       | 1562          | 56         | 98                                                                 |                                                                                                      |                                                           |
|                        | KIAA1304 | 1051                   | KIAA0456       | 1095          | 68         | 99                                                                 |                                                                                                      |                                                           |
|                        | KIAA1306 | 1154                   | KIAA1139       | 1124          | 34         | 100                                                                |                                                                                                      |                                                           |
|                        | KIAA1309 | 639                    | KIAA1354       | 632           | 92         | 97                                                                 |                                                                                                      |                                                           |
|                        |          | 639                    | KIAA1129       | 625           | 30         | 86                                                                 |                                                                                                      |                                                           |
|                        | KIAA1316 | 1590                   | KIAA1414       | 1586          | 56         | 98                                                                 |                                                                                                      |                                                           |
|                        | KIAA1346 | 999                    | KIAA0688       | 849           | 49         | 81                                                                 |                                                                                                      |                                                           |
|                        | KIAA1347 | 918                    | KIAA0703       | 1051          | 68         | 96                                                                 |                                                                                                      |                                                           |
|                        | KIAA1349 | 752                    | KIAA1141       | 914           | 45         | 81                                                                 |                                                                                                      |                                                           |
|                        | KIAA1354 | 632                    | KIAA1129       | 625           | 30         | 86                                                                 |                                                                                                      |                                                           |
|                        | KIAA1361 | 1005                   | KIAA0881       | 1064          | 70         | 100                                                                |                                                                                                      |                                                           |
|                        | KIAA1366 | 550                    | KIAA0951       | 679           | 61         | 100                                                                |                                                                                                      |                                                           |
|                        | KIAA1378 | 451                    | KIAA0795       | 465           | 35         | 96                                                                 |                                                                                                      |                                                           |
|                        | KIAA1396 | 551                    | KIAA0798       | 682           | 50         | 88                                                                 |                                                                                                      |                                                           |
|                        | KIAA1431 | 891                    | KIAA0065       | 848           | 41         | 86                                                                 |                                                                                                      |                                                           |
|                        | KIAA1441 | 1258                   | KIAA0211       | 1317          | 34         | 92                                                                 |                                                                                                      |                                                           |
|                        | yeast    | KIAA1347               | 918            | SW-ATCL_YEAST | 950        | 50                                                                 | 95                                                                                                   | Ca <sup>2+</sup> -transporting ATPase (EC 3.6.1.38)       |
|                        |          | KIAA1352               | 1212           | SW-SYLC_YEAST | 1090       | 46                                                                 | 84                                                                                                   | leucyl-tRNA synthetase, cytoplasmic (EC 6.1.1.4)          |
|                        |          | KIAA1401               | 853            | S67595        | 788        | 30                                                                 | 90                                                                                                   | hypothetical protein YDL060w                              |
| <i>C.elegans</i>       | KIAA1347 | 918                    | ZK256.1a       | 922           | 59         | 94                                                                 | CECC42                                                                                               |                                                           |
|                        |          |                        | K11D9.2b       | 1004          | 36         | 81                                                                 | CEK11D91                                                                                             |                                                           |
|                        |          |                        | K11D9.2a       | 1059          | 36         | 81                                                                 | CEK11D92                                                                                             |                                                           |
|                        |          |                        | B0365.3        | 996           | 30         | 85                                                                 | CEB03652                                                                                             |                                                           |
|                        |          |                        | C01G12.8       | 1049          | 30         | 82                                                                 | CECO1G126                                                                                            |                                                           |
|                        | KIAA1352 | 1212                   | R74.1          | 1186          | 56         | 97                                                                 | probable leucyl-tRNA synthetase (EC 6.1.1.4)                                                         |                                                           |
|                        | KIAA1361 | 1005                   | T17E9.1        | 982           | 37         | 89                                                                 | serine/threonine-protein kinase <i>sulu</i> (EC 2.7.1.-)                                             |                                                           |
|                        | KIAA1374 | 764                    | F18G1.1        | 759           | 41         | 95                                                                 | che-2 protein                                                                                        |                                                           |
|                        | KIAA1378 | 451                    | R12E2.1        | 531           | 39         | 81                                                                 | CELR12E214                                                                                           |                                                           |
|                        | KIAA1401 | 853                    | F10G7.1        | 785           | 39         | 91                                                                 | CELF10G79                                                                                            |                                                           |
|                        | KIAA1422 | 1151                   | F08B12.3b      | 1107          | 46         | 83                                                                 | CEFR08B122                                                                                           |                                                           |
|                        |          |                        | F08B12.3a      | 1119          | 46         | 83                                                                 | CEFR08B123                                                                                           |                                                           |
|                        | KIAA1434 | 677                    | T05H10.7       | 796           | 33         | 90                                                                 | hypothetical 90.8 kd protein t05h10.7 in chromosome II                                               |                                                           |
|                        |          |                        | K10B3.6        | 757           | 30         | 93                                                                 | CELK10B31                                                                                            |                                                           |
|                        | KIAA1435 | 415                    | D2013.2        | 415           | 40         | 95                                                                 | hypothetical 46.2 kd trp-asp repeats containing protein d2013.2 in chromosome II                     |                                                           |
|                        | OWL      | KIAA1296               | 815            | AF078667      | 714        | 82                                                                 | 96                                                                                                   | ponsin-1, complete cds. - mouse                           |
|                        |          | KIAA1299               | 730            | JC5887        | 670        | 93                                                                 | 92                                                                                                   | signaling mediator variant - mouse                        |
|                        |          | KIAA1301               | 1581           | KIAA0322      | 1562       | 56                                                                 | 98                                                                                                   | KIAA0322, partial cds. - human                            |
|                        |          | KIAA1303               | 1119           | SPAC57A7.10   | 1313       | 38                                                                 | 98                                                                                                   | <i>S.pombe</i> chromosome I cosmid c57A7. - fission yeast |
|                        |          | KIAA1304               | 1051           | KIAA0456      | 1095       | 68                                                                 | 99                                                                                                   | KIAA0456, partial cds. - human                            |
| KIAA1309               |          | 639                    | AF059569       | 593           | 30         | 85                                                                 | actin binding protein MAYYEN, complete cds. - human                                                  |                                                           |
| KIAA1327               |          | 1310                   | T03730         | 1567          | 61         | 100                                                                | antigen containing epitope to monoclonal antibody MMS-85/12 - mouse                                  |                                                           |
| KIAA1341               |          | 620                    | S35532         | 729           | 45         | 89                                                                 | hnRNA-binding protein M4 - human                                                                     |                                                           |
| KIAA1342               |          | 426                    | SYT4_RAT       | 425           | 90         | 100                                                                | synaptotagmin IV - rat                                                                               |                                                           |
| KIAA1346               |          | 999                    | T00017         | 951           | 82         | 95                                                                 | ADAMTS-1 protein - mouse                                                                             |                                                           |
| KIAA1347               |          | 918                    | A42764         | 919           | 97         | 100                                                                | Ca <sup>2+</sup> -transporting ATPase (EC 3.6.1.38) - rat                                            |                                                           |
| KIAA1348               |          | 545                    | AF062741       | 530           | 84         | 97                                                                 | pyruvate dehydrogenase phosphatase isoenzyme 2, complete cds. - rat                                  |                                                           |
| KIAA1349               |          | 752                    | ZN43_HUMAN     | 803           | 54         | 84                                                                 | zinc finger protein 43 - human                                                                       |                                                           |
| KIAA1352               |          | 1212                   | SYLC_CAEEL     | 1198          | 56         | 97                                                                 | probable leucyl-tRNA synthetase (EC 6.1.1.4) - <i>C. elegans</i>                                     |                                                           |
| KIAA1354               |          | 632                    | AF059569       | 593           | 30         | 86                                                                 | actin binding protein MAYYEN, complete cds. - human                                                  |                                                           |
| KIAA1356               |          | 519                    | CIN1_HUMAN     | 423           | 91         | 81                                                                 | sodium channel protein, brain I alpha subunit - human                                                |                                                           |
| KIAA1361               |          | 1005                   | AF084205       | 1001          | 99         | 100                                                                | serine/threonine protein kinase TAO1, complete cds. - rat                                            |                                                           |
| KIAA1363               |          | 430                    | A58922         | 398           | 43         | 94                                                                 | esterase/N-acetylase (EC 3.5.1.-), 50K hepatic - rabbit                                              |                                                           |
| KIAA1368               |          | 1049                   | AF030430       | 888           | 93         | 84                                                                 | semaphorin VIIa, complete cds. - mouse                                                               |                                                           |
| KIAA1369               |          | 653                    | AF028808       | 619           | 83         | 95                                                                 | hemin-sensitive initiation factor 2 alpha kinase, complete cds. - mouse                              |                                                           |
| KIAA1373               |          | 463                    | HSU73523       | 424           | 57         | 87                                                                 | AMSH, complete cds. - human                                                                          |                                                           |
| KIAA1374               |          | 764                    | CEL115223      | 760           | 44         | 98                                                                 | CHE-2 protein - <i>C. elegans</i>                                                                    |                                                           |
| KIAA1376               |          | 437                    | S73591B        | 391           | 41         | 89                                                                 | brain-expressed HHCPA78 homolog - human                                                              |                                                           |
| KIAA1378               |          | 451                    | KIAA0795       | 465           | 35         | 96                                                                 | KIAA0795, partial cds. - human                                                                       |                                                           |
| KIAA1379               |          | 434                    | AF104402       | 441           | 96         | 100                                                                | syndapin 1, complete cds. - rat                                                                      |                                                           |
| KIAA1381               |          | 961                    | AF109377       | 980           | 82         | 99                                                                 | ldfBp (LDLB), complete cds. - mouse                                                                  |                                                           |
| KIAA1382               |          | 462                    | HSU49082       | 504           | 57         | 98                                                                 | transporter protein (g17), complete cds. - human                                                     |                                                           |
| KIAA1385               |          | 768                    | GEPH_RAT       | 736           | 100        | 96                                                                 | gephyrin (putative glycine receptor-tubulin linker protein) - rat                                    |                                                           |
| KIAA1388               |          | 599                    | Z184_HUMAN     | 726           | 38         | 82                                                                 | zinc finger protein 184 - human                                                                      |                                                           |
| KIAA1389               |          | 1514                   | AF090989       | 1783          | 53         | 96                                                                 | putative GAP protein alpha, complete cds. - human                                                    |                                                           |
| KIAA1393               |          | 500                    | JC4255         | 475           | 33         | 82                                                                 | mct-10+ protein - <i>Neurospora crassa</i>                                                           |                                                           |
| KIAA1396               |          | 551                    | Z135_HUMAN     | 469           | 59         | 83                                                                 | zinc finger protein 135 - human                                                                      |                                                           |
| KIAA1398               |          | 1456                   | A36734         | 1534          | 83         | 95                                                                 | ribosome receptor, 180k - dog                                                                        |                                                           |
| KIAA1403               |          | 693                    | MMU08549       | 896           | 97         | 80                                                                 | OL-proteocaltherin, complete cds. - mouse                                                            |                                                           |
| KIAA1401               |          | 853                    | CELF10G79      | 785           | 39         | 91                                                                 | <i>Caenorhabditis elegans</i> cosmid F10G7. - <i>C. elegans</i>                                      |                                                           |
| KIAA1422               |          | 1151                   | AF089730       | 1237          | 94         | 91                                                                 | potassium channel subunit (Slack), complete cds. - rat                                               |                                                           |
| KIAA1431               |          | 891                    | Z184_HUMAN     | 726           | 45         | 83                                                                 | zinc finger protein 184 - human                                                                      |                                                           |
| KIAA1433               |          | 652                    | AF053768       | 630           | 39         | 94                                                                 | brain specific cortactin-binding protein CBP90, partial cds. - rat                                   |                                                           |
| KIAA1434               |          | 677                    | YRS7_CAEEL     | 796           | 33         | 90                                                                 | hypothetical 90.8 KD protein T05H10.7 in chromosome II - <i>C. elegans</i>                           |                                                           |
| KIAA1435               |          | 415                    | YLN2_CAEEL     | 415           | 40         | 95                                                                 | hypothetical 46.2 kd trp-asp repeats containing protein d2013.2 in chromosome II - <i>C. elegans</i> |                                                           |
| KIAA1436               | 924      | FPRP_RAT               | 879            | 89            | 95         | prostaglandin F2-alpha receptor regulatory protein precursor - rat |                                                                                                      |                                                           |
| KIAA1439               | 561      | NFIL_RAT               | 509            | 100           | 91         | nuclear factor 1 (NF-1) - rat                                      |                                                                                                      |                                                           |
| KIAA1441               | 1258     | D86966                 | 1267           | 34            | 92         | KIAA0211, complete cds. - human                                    |                                                                                                      |                                                           |
| KIAA1442               | 627      | MMU92704               | 551            | 77            | 83         | Olf-1/EBF-like-2(O5) transcription factor, complete cds. - mouse   |                                                                                                      |                                                           |

a) The definition of homologues used here was the proteins found in the databases satisfying the following conditions: i) the length ranged from 80% to 125% of the query sequence; ii) the ratio of the length of aligned region to that of the original sequence of the query was 80% or greater; iii) percent identity was 30% or greater. The method of homology search was the same to that explained in Table 2-1. b) The following databases were used. HUGE, our cDNA-encoded protein database (<http://www.kazusa.or.jp/huge>); yeast, non redundant peptide database from genome-ftp.stanford.edu:/pub/yeast/yeast.protein/yeast\_nrpep.fasta.Z; *C. elegans*, protein database deduced from *C. elegans full genome* sequence ([ftp.sanger.ac.uk:/pub/databases/C.elegans\\_sequences/C\\_elegans\\_proteins\\_1998-10-16.pep](ftp.sanger.ac.uk:/pub/databases/C.elegans_sequences/C_elegans_proteins_1998-10-16.pep)) and the entries derived from *C. elegans* of OWL, and OWL (release 31.4). In the case of database search against OWL, only the homologue with the highest score to each query was listed. c) The number of amino acid residues of the gene product. d) The values mean the ratio of the length of aligned region to the original length of the query sequence, in percentage. e) For entries from databases, yeast and OWL, the annotations were listed. For *C. elegans*, IDs of OWL were listed, when sequences identical to the entries from the full genome were registered in OWL.

KIAA1416, KIAA1420, KIAA1421 and KIAA1422) seemed to lack regions encoding C-terminal portions due to the presence of a *Not*I site in their coding regions because cDNAs were digested with *Not*I before ligation into vector. In contrast, clones for five genes (KIAA1439-KIAA1443) were found to lack 5'-portions of the sequences due to the presence of an internal *Not*I site in their sequences. For these five genes, the nucleotide sequences of only the region between two *Not*I sites were determined, since their original clones were most likely to harbor two intermolecularly ligated independent cDNAs.<sup>6</sup> After these revisions, the average size of the cDNA sequences became 4.8 kb and that of the ORFs corresponded to approximately 910 amino acid residues. Physical maps of the 150 cDNA sequences analyzed are shown in Fig. 1, where the ORFs and the first ATG codons in respective ORFs are indicated by solid boxes and triangles, respectively. Repeat sequences are also shown in Fig. 1. Comparing the predicted protein-coding sequence for KIAA1299 with those of mouse and rat homologues,<sup>7,8</sup> this cDNA clone seems to encode a complete protein although it possessed an unusually long 5' non-coding sequence expanding more than 3 kb. Table 1 lists the lengths of inserts, the ORF lengths and the chromosomal locations of the respective clones. Chromosomal loci of 66 newly identified genes were assigned using human-rodent hybrid panels, GeneBridge 4 (Research Genetics Inc., USA),<sup>9</sup> since their mapping data were not available in the public databases. The chromosomal locations of the 78 genes, which are highlighted by asterisks in Table 1, were fetched from the UniGene database (<http://www.ncbi.nlm.nih.gov/UniGene>). The chromosomal locations of the remaining six genes, which are highlighted in Table 1, were obtained from the GenBank database because the sequences of the cDNA clones were already assigned to chromosome numbers.

## 2. Functional Classification of Predicted Gene Products

The gene products predicted from the cDNA sequences were classified by homology and/or motif search against the following public databases: protein sequence database, OWL (release 31.4),<sup>10</sup> databases of predicted protein sequences from yeast<sup>11</sup> and *C. elegans*<sup>12</sup> genomes [[genome-ftp.stanford.edu/pub/yeast/yeast\\_protein/yeast\\_nrpep.fasta.Z](http://genome-ftp.stanford.edu/pub/yeast/yeast_protein/yeast_nrpep.fasta.Z), [ftp.sanger.ac.uk/pub/databases/C.elegans\\_sequences/C\\_elegans\\_proteins.1998-10-16.pep](http://ftp.sanger.ac.uk/pub/databases/C.elegans_sequences/C_elegans_proteins.1998-10-16.pep)], protein domain database, Pfam (release 4.4),<sup>13</sup> and our own database, HUGE<sup>14</sup> (<http://www.kazusa.or.jp/huge>). As shown in Table 2, the 73 gene products were classified into five functional categories. Among them, 53 gene products indicated significant sequence similarity to functionally annotated proteins (Table 2-1). The functions of the other 20 gene products were predicted based on the presence of functional motifs/domains,

since they did not show sequence similarity to functionally annotated proteins (Table 2-2). In total, 63 gene products (86.3% of genes functionally annotated here) were suggested to have functions relating to cell signaling/communication, nucleic acid management or cell structure/motility. Of the 12 genes in functional class of nucleic acid management, 5 coded for DNA binding proteins carrying C<sub>2</sub>H<sub>2</sub>-type zinc finger domains. The average number of these domains among these gene products was about 15. Since the majority of zinc finger proteins in yeast contain only two domains per polypeptide, multiple appearance of C<sub>2</sub>H<sub>2</sub>-type zinc finger domains in a single polypeptide might be a specific character of large proteins in multicellular organisms. To find the genes conserved in other species, we tentatively defined "homologues" as genes sharing at least 30% of protein sequence identity spanning almost the entire region (more than 80% coverage against the query protein sequence). As shown in Table 3, 48 KIAA gene products were found to have the "homologues" in the databases. Homologues to 9 of the 48 KIAA proteins were found in *C. elegans* and 3 (KIAA1347, KIAA1352 and KIAA1401) were found in both yeast and *C. elegans*. KIAA1347 and KIAA1352 were similar to Ca<sup>2+</sup>-transporting ATPase and leucyl-tRNA synthetase, respectively, though KIAA1401 had no similarity to any functionally known genes.

## 3. Expression Profiles of Predicted Genes

The expression profiles of the genes newly identified in this study are shown in Fig. 2 by using color codes.<sup>15</sup> KIAA1379 was homologous to rat synaptic dynamin-associated protein I (Syndapin I)<sup>16</sup> and predominantly expressed in hippocampus. The gene expression levels of KIAA1341 and KIAA1366, which were similar to mouse transcriptional suppressor of the myelin basic protein gene<sup>17</sup> and rat neuroligin 2,<sup>18</sup> respectively, were relatively high in all brain regions examined. KIAA1346 and KIAA1434 were predominantly expressed in spinal cord. KIAA1312, KIAA11315 and KIAA1417 were expressed very poorly in all regions examined, but their mRNAs were detected. These expression profiles also provide us important information for identifying biologically important genes characterized in this project.

**Acknowledgements:** This project was supported by grants from the Kazusa DNA Research Institute. We thank Tomomi Tajino, Keishi Ozawa, Tomomi Kato, Kazuhiro Sato, Akiko Ukigai, Emiko Suzuki, Kazuko Yamada, Kiyoe Sumi, Takashi Watanabe, Kozue Kaneko, Chie Mori, Naoko Shibano, Hisako Takahashi, Satomi Nakagaki, and Kazutaka Mitsui for their technical assistance.

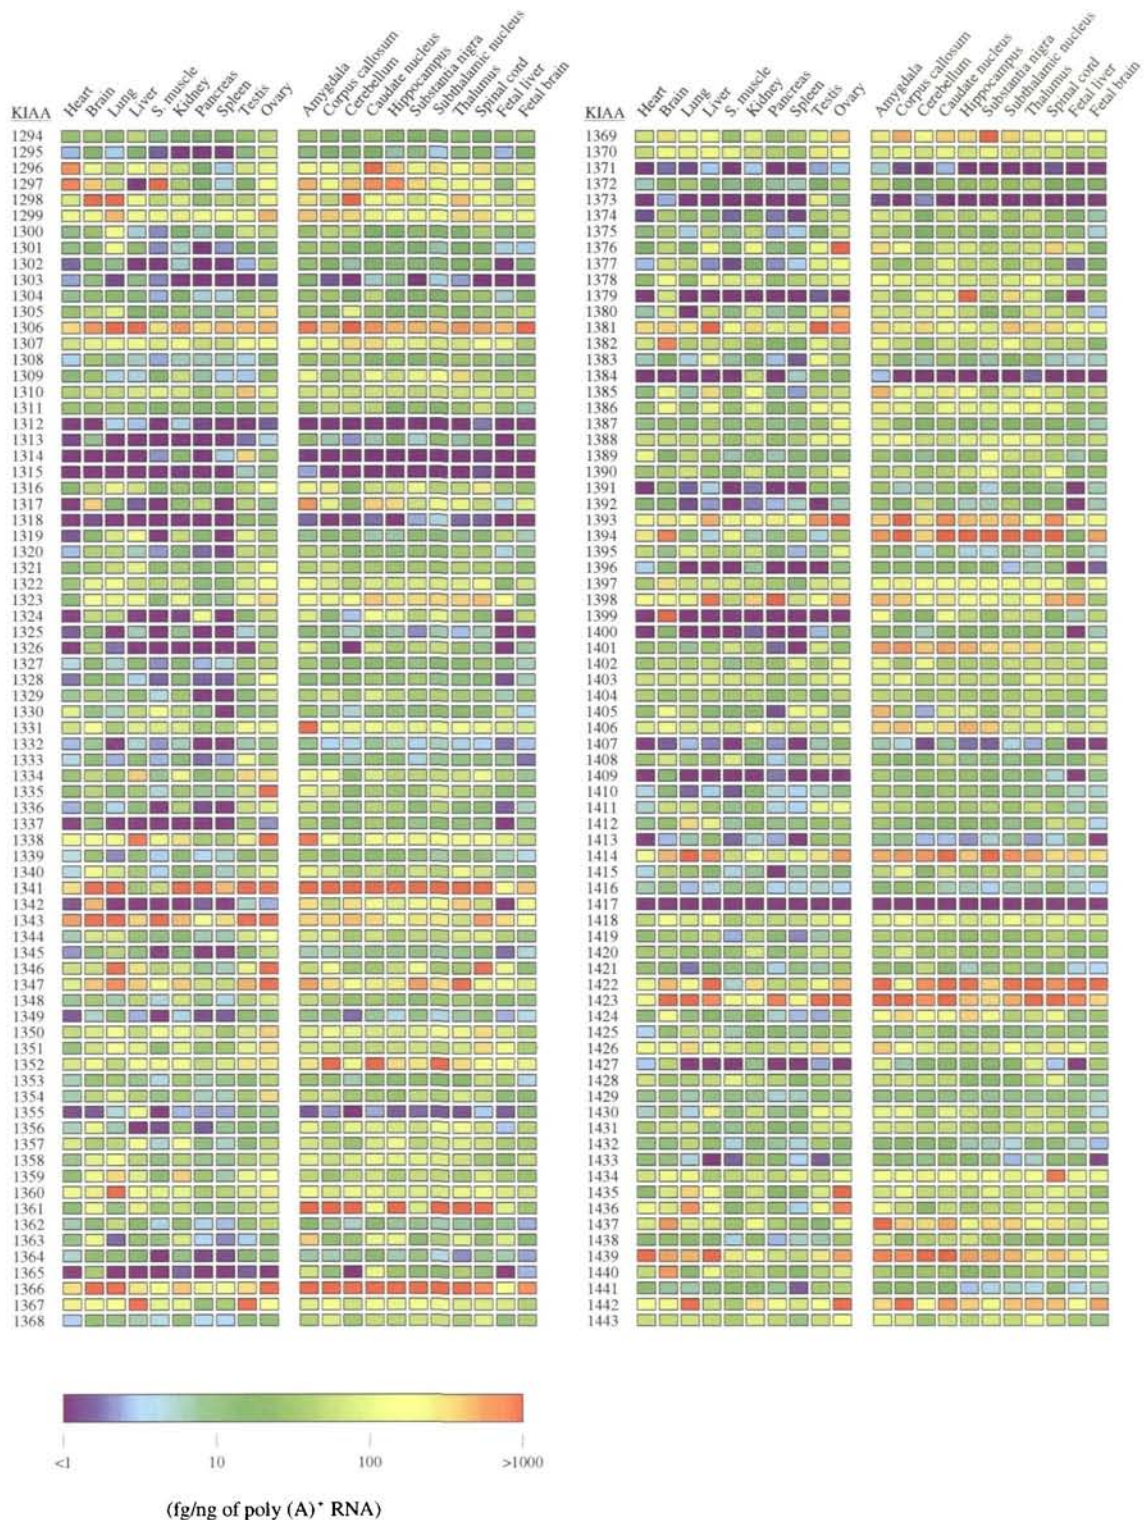

**Figure 2.** Expression profiles of 150 newly identified genes examined by RT-PCR ELISA. The tissue expression levels of the 150 human genes were analyzed by using the RT-PCR ELISA according to methods previously described.<sup>15</sup> Gene names are given as KIAA numbers at the left side of each set of color codes. Tissue and brain region names are indicated above the top sets of color codes. A color conversion panel shown at the bottom was used for displaying mRNA levels as color codes. The mRNA levels are expressed in equivalent amounts (fg) of the authentic cDNA plasmids in 1 ng of starting poly(A)<sup>+</sup> RNAs. Besides 10 tissues, 9 regions of the adult central nervous system (amygdala, corpus callosum, cerebellum, caudate nucleus, hippocampus, substantia nigra, subthalamic nucleus, thalamus, and spinal cord) and fetal brain were included in the expression profiling. As a control, mRNA levels in fetal liver were also examined.



## References

1. Nomura, N., Miyajima, N., Sazuka, T. et al. 1994, Prediction of the coding sequences of unidentified human genes. I. The coding sequences of 40 new genes (KIAA0001-KIAA0040) deduced by analysis of randomly sampled cDNA clones from human immature myeloid cell line KG-1, *DNA Res.*, **1**, 27–35.
2. Nagase, T., Ishikawa, K.-I., Kikuno, R. et al. 1999, Prediction of the coding sequences of unidentified human genes. XV. The complete sequences of 100 new cDNA clones from brain which code for large proteins *in vitro*, *DNA Res.*, **6**, 337–345.
3. Ohara, O., Nagase, T., Ishikawa, K.-I. et al. 1997, Construction and characterization of human brain cDNA libraries suitable for analysis of cDNA clones encoding relatively large proteins, *DNA Res.*, **4**, 53–59.
4. Hirosawa, M., Nagase, T., Ishikawa, K.-I., Kikuno, R., Nomura, N., and Ohara, O. 1999, Characterization of cDNA clones selected by the GeneMark analysis from size-fractionated cDNA libraries from human brain, *DNA Res.*, **6**, 329–336.
5. Ishikawa, K.-I., Nagase, T., Nakajima, D. et al. 1997, Prediction of the coding sequences of unidentified human genes. VIII. 78 new cDNA clones from brain which code for large proteins *in vitro*, *DNA Res.*, **4**, 307–313.
6. Nagase, T., Ishikawa, K.-I., Miyajima, N. et al. 1998, Prediction of the coding sequences of unidentified human genes. IX. 100 new cDNA clones from brain which can code for large proteins *in vitro*, *DNA Res.*, **5**, 31–39.
7. Riedel, H., Wang, J., Hansen, H., and Yousaf, N. 1997, PSM, an insulin-dependent, pro-rich, PH, SH2 domain containing partner of the insulin receptor, *J. Biochem.*, **122**, 1105–1113.
8. Rui, L., Mathews, L. S., Hotta, K., Gustafson, T. A., and Carter-Su, C. 1997, Identification of SH2-Bbeta as a substrate of the tyrosine kinase JAK2 involved in growth hormone signaling, *Mol. Cell Biol.*, **17**, 6633–6644.
9. Gyapay, G., Schmitt, K., Fizames, C. et al. 1996, A radiation hybrid map of the human genome, *Hum. Mol. Genet.*, **5**, 339–346.
10. Bleasby, A. J., Akrigg, D., and Attwood, T. K. 1994, OWL – a non-redundant composite protein sequence database, *Nucleic Acids Res.*, **22**, 3574–3577.
11. Goffeau, A., Barrell, B. G., Bussey, H. et al. 1996, Life with 6000 genes, *Science*, **274**, 546–567.
12. The C. elegans Sequencing Consortium. 1998, Genome sequence of the nematode, *C. elegans*: A platform for investing biology, *Science*, **282**, 2012–2018.
13. Bateman, A., Birney, E., Durbin, R. et al. 1999, Pfam 3.1: 1313 multiple alignments and profile HMMs match the majority of proteins, *Nucleic Acids Res.*, **27**, 260–262.
14. Kikuno, R., Nagase, T., Suyama, M., Waki, M., Hirosawa, M., and Ohara, O. 2000, HUGE: a database for human large proteins identified in Kazusa cDNA sequencing project, *Nucleic Acids Res.*, **28**, 331–332.
15. Nagase, T., Ishikawa, K.-I., Suyama, M. et al. 1998, Prediction of the coding sequences of unidentified human genes. XI. The complete sequences of 100 new cDNA clones from brain which code for large proteins *in vitro*, *DNA Res.*, **5**, 277–276.
16. Qualmann, B., Roos, J., DiGregorio, P. J., and Kelly, R. B. 1999, Syndapin I, a synaptic dynamin-binding protein that associates with the neural Wiskott-Aldrich syndrome protein, *Mol. Biol. Cell*, **10**, 501–513.
17. Steplewski, A., Haas, S., Amini, S., and Khalili, K. 1995, Regulation of mouse myelin basic protein gene transcription by a sequence-specific single-stranded DNA-binding protein *in vitro*, *Gene*, **154**, 215–218.
18. Ichtchenko, K., Nguyen, T., and Sudhof, T. C. 1996, Structures, alternative splicing, and neurexin binding of multiple neuroligins, *J. Biol. Chem.*, **271**, 2676–2682.
